# Supplementary material for: NMR-Based Metabolomic Analysis for the Effects of Trimethylamine N-Oxide Treatment on C2C12 Myoblasts under Oxidative Stress
Source: MDPI journal article supplement (doi:10.3390/biom12091288), 2022-09-13
Supplement: s1 [file s1]

## Supplementary Materials

**Figure S1.**

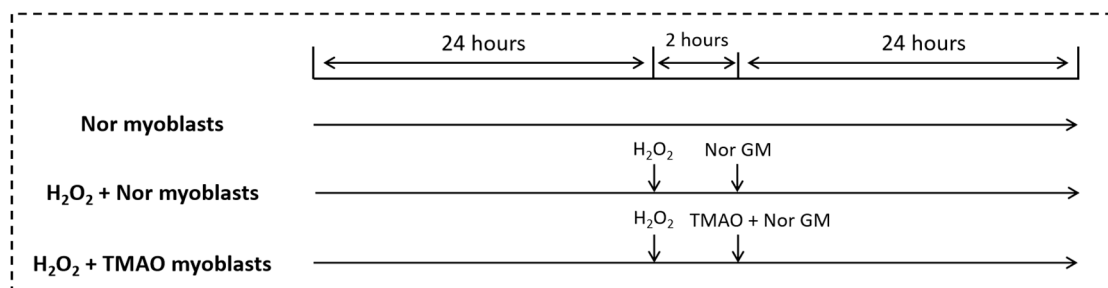

**Figure S1.** Schematic representation of the cell experimental design. C2C12 cells were firstly cultured in normal growth medium (Nor GM) to reach 50-60% confluence for 24 h. H<sub>2</sub>O<sub>2</sub> was added to C2C12 myoblasts at a final concentration of 0.5 mM for 2 h, and then the medium was removed. Nor GM was added in the H<sub>2</sub>O<sub>2</sub>-treated (H<sub>2</sub>O<sub>2</sub>) group; TMAO was dissolved in normal growth medium to C2C12 myoblasts for 24 h in the TMAO-treated (TMAO) groups with three final concentrations of TMAO (1, 5 and 10 mM).

**Figure S2.**

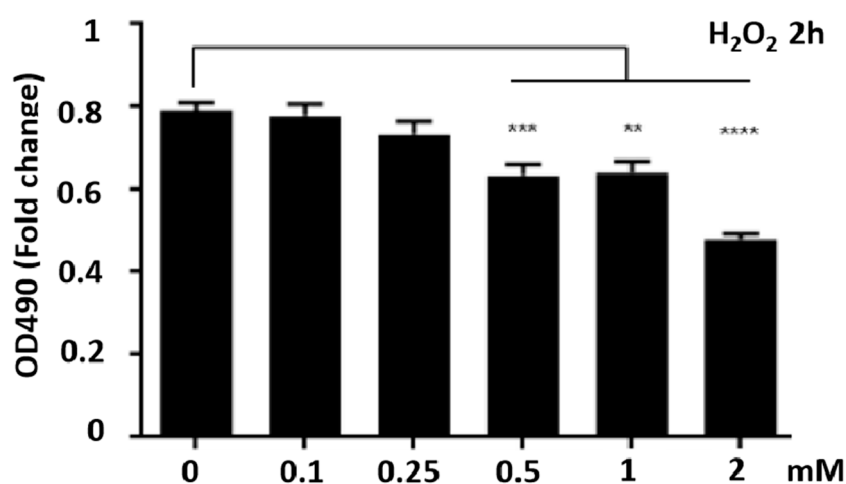

**Figure S2.** Cell viabilities of C2C12 myoblasts treated by H<sub>2</sub>O<sub>2</sub> at various concentrations for 2h. Cell viabilities were assessed by measured OD<sub>490 nm</sub> values with the MTS approach ( $n = 6$ ). \*\*  $p < 0.01$ , \*\*\*  $P < 0.001$ , \*\*\*\*  $p < 0.0001$

**Figure S3.**

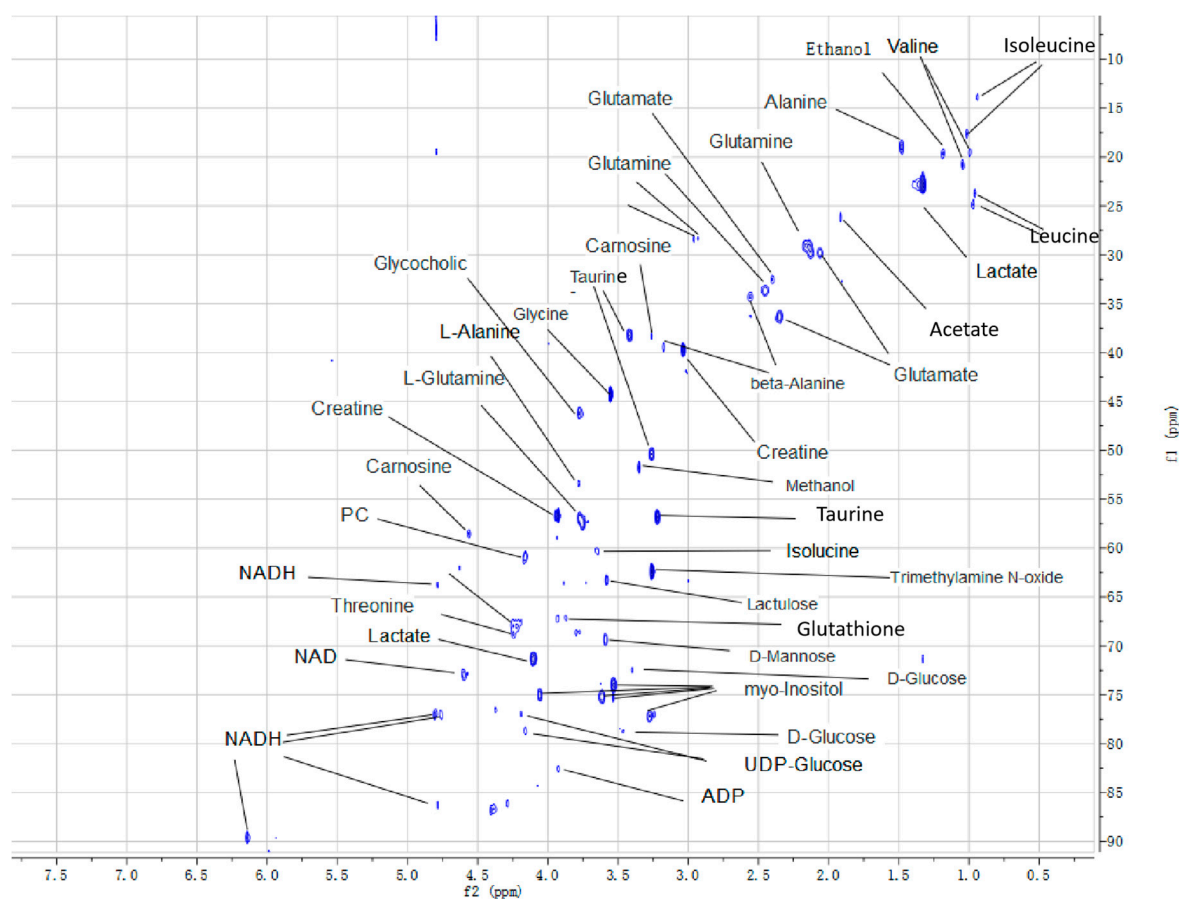

**Figure S3.** Representative 2D  $^1\text{H}$ - $^{13}\text{C}$  HSQC spectrum of aqueous extracts derived from C2C12 myoblasts recorded on 850 MHz NMR spectrometer.

Figure S4.

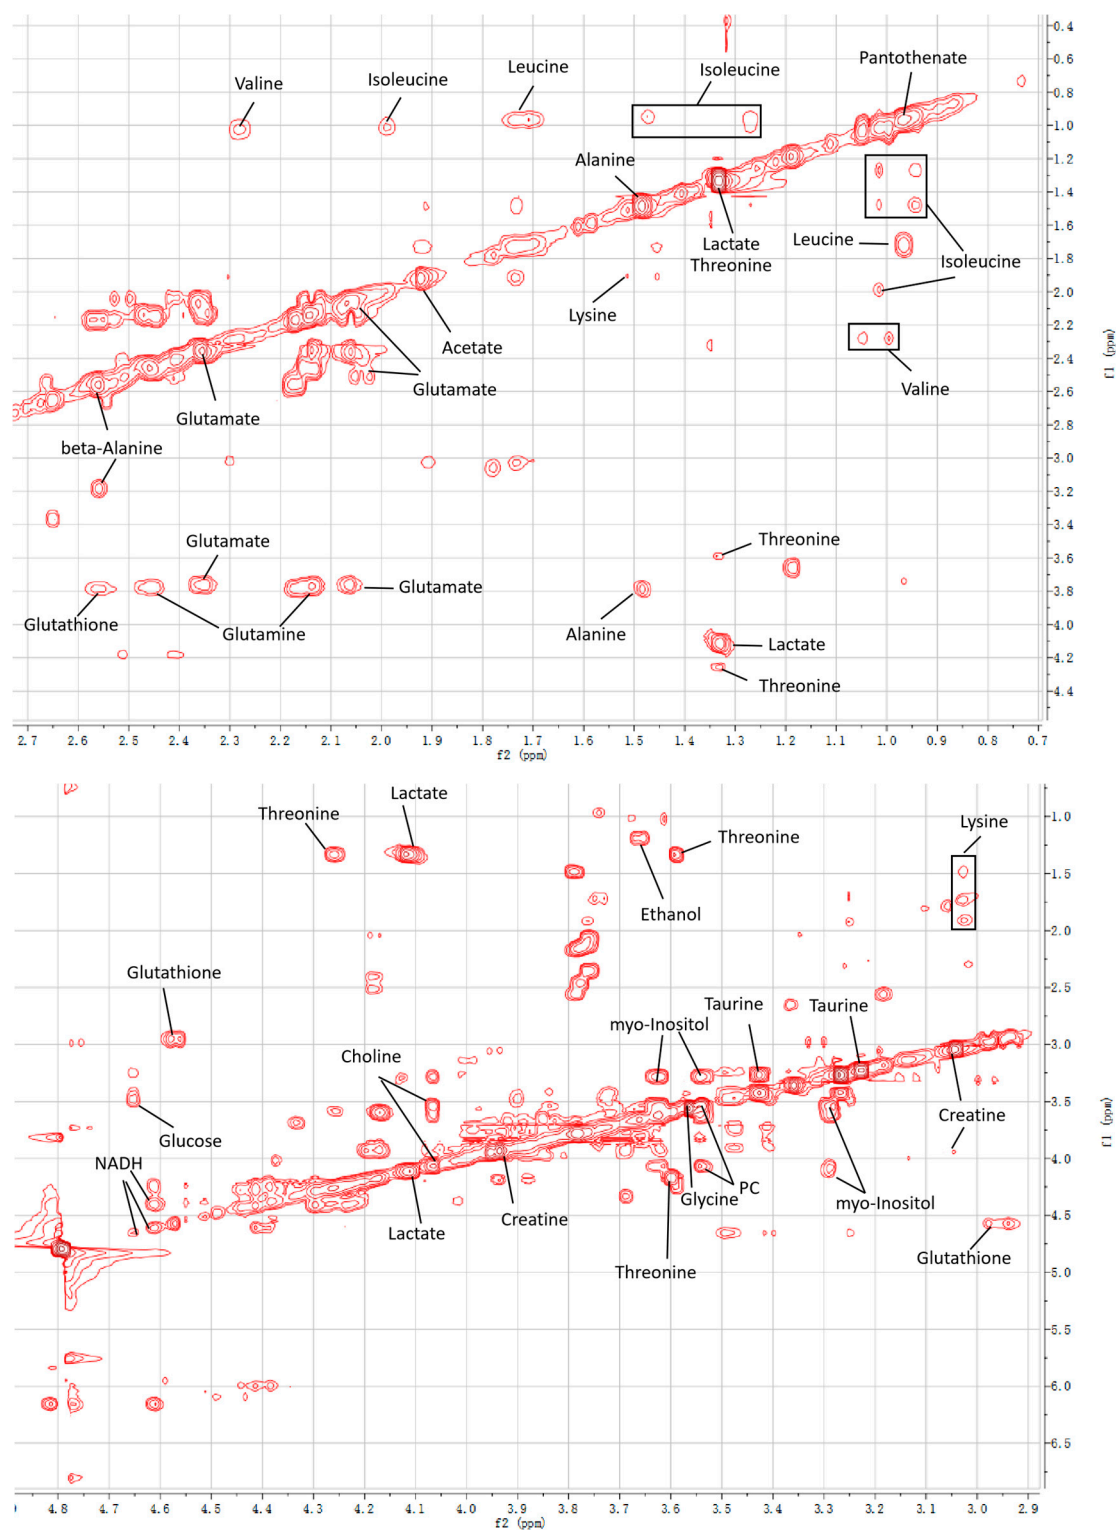

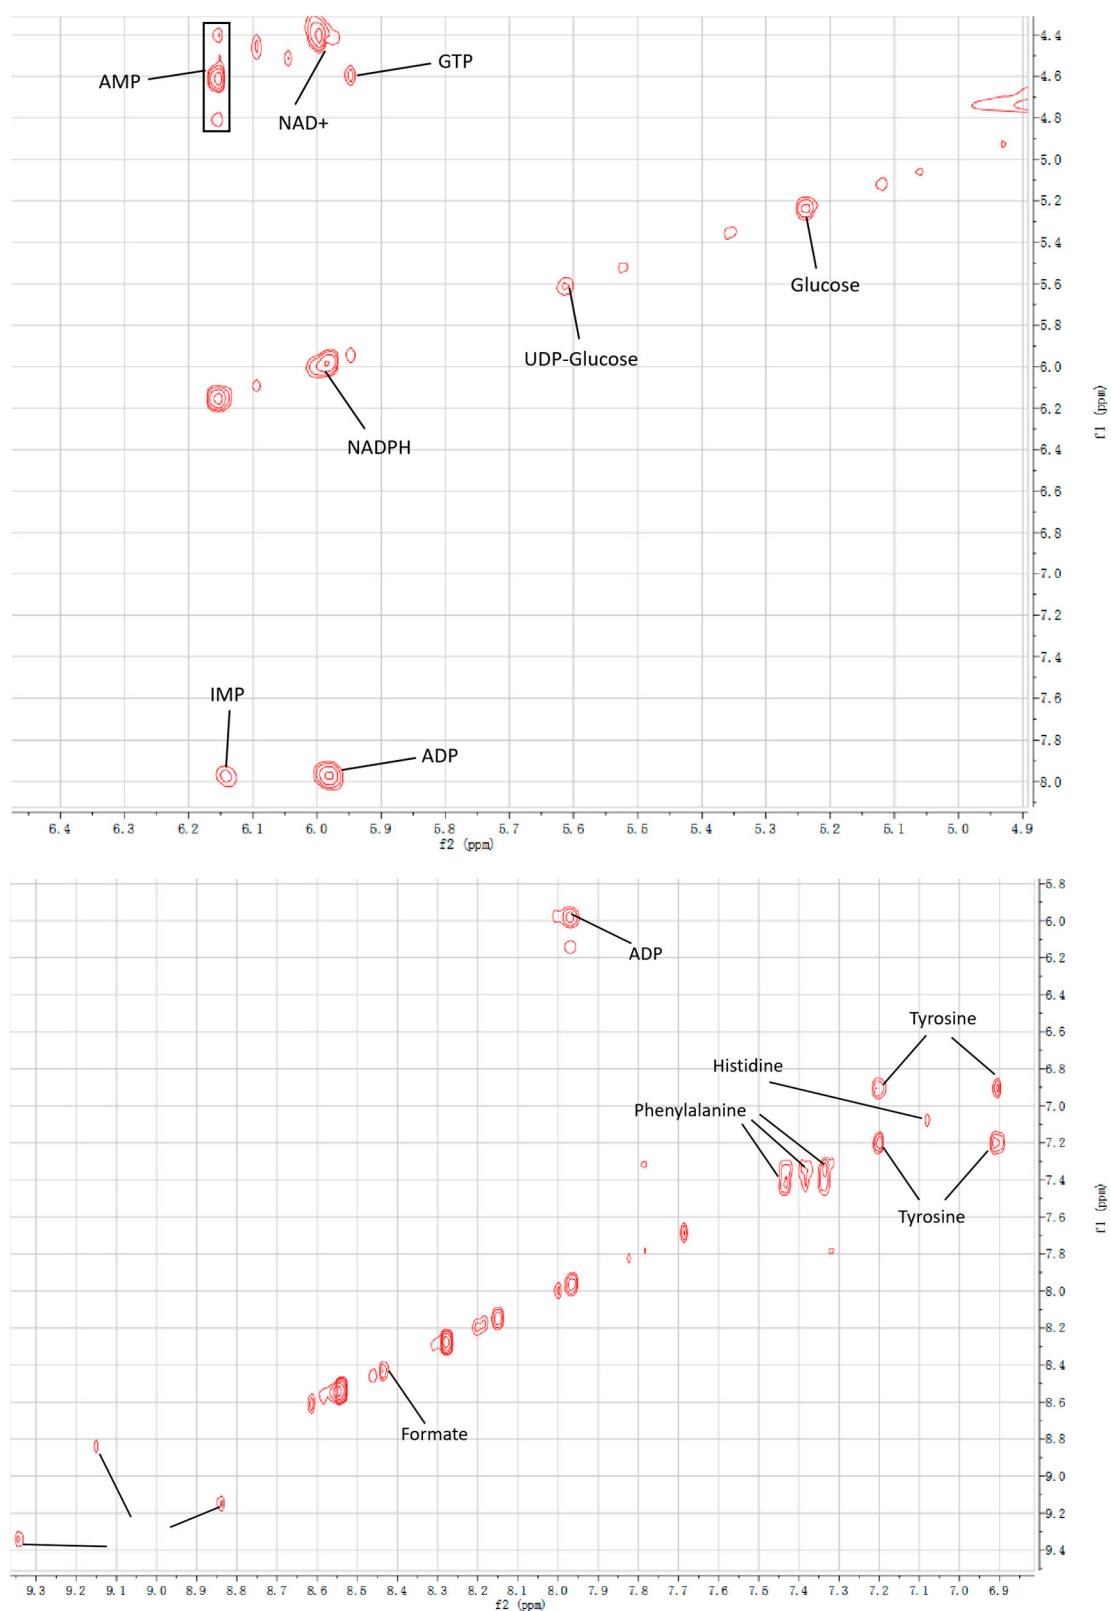

**Figure S4.** Representative 2D  $^1\text{H}$ - $^1\text{H}$  TOCSY spectrum of aqueous extracts derived from C2C12 myoblasts recorded on 850 MHz NMR spectrometer.

**Figure S5.**

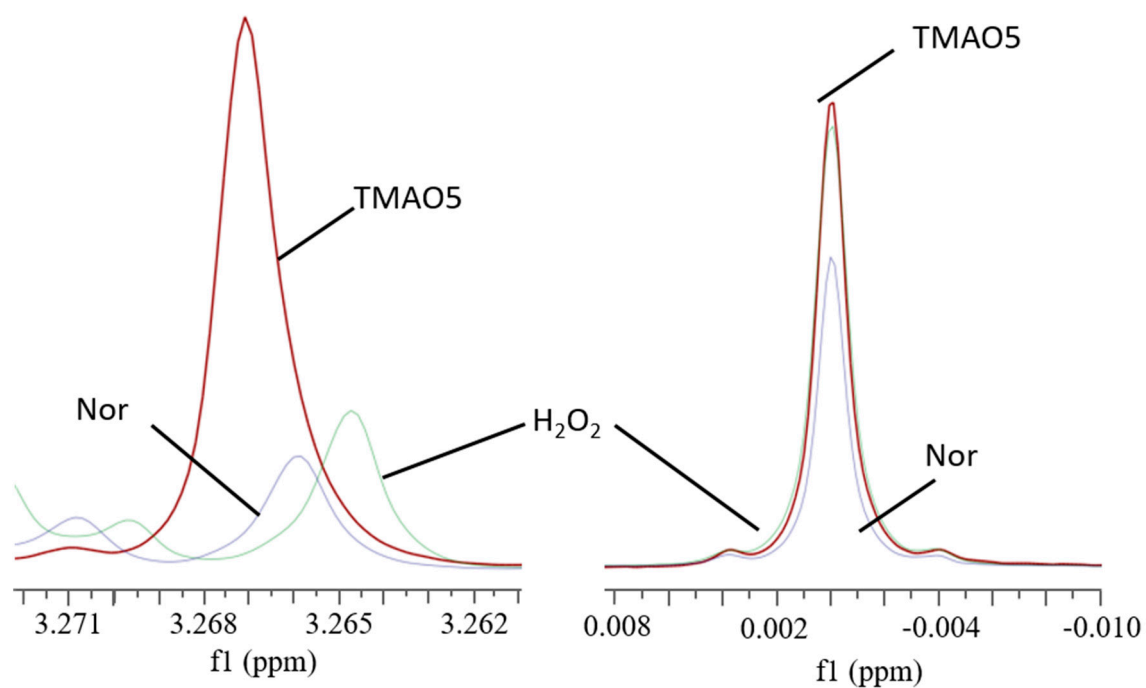

**Figure S5.** Local amplified regions of TMAO peaks in a typical 850 MHz  $^1\text{H}$  NMR spectrum recorded on aqueous extracts derived from three groups of C2C12 myoblasts. The TSP peak was used as a chemical shift reference ( $\delta$  0.00). Blue line: spectral region from the Nor group. Green line: spectral region from the  $\text{H}_2\text{O}_2$  group. Brown line: spectral region from the TMAO5 group.

**Table S1.** Identified metabolites in <sup>1</sup>H NMR spectra of aqueous extracts derived from C2C12 myoblasts

| NO. | Metabolites                       | δ <sup>1</sup> H (ppm) and multiplicity                       | Moieties                                                                                                                                                                                                                                        |
|-----|-----------------------------------|---------------------------------------------------------------|-------------------------------------------------------------------------------------------------------------------------------------------------------------------------------------------------------------------------------------------------|
| 1   | Pantothenate                      | 0.90(s), 0.94(s)                                              | CH <sub>3</sub> , CH <sub>3</sub>                                                                                                                                                                                                               |
| 2   | Isoleucine                        | 0.93(t), 1.00(d), 1.26(m), 1.42(m), 1.99(m), 3.66(d)          | δ-CH <sub>3</sub> , γ-CH <sub>3</sub> , half γ-CH <sub>2</sub> , half γ-CH <sub>2</sub> , β-CH, α-CH                                                                                                                                            |
| 3   | Leucine                           | 0.94(d), 0.97(d), 1.71(m), 1.74(m), 3.73(m)                   | α-CH <sub>3</sub> , α-CH <sub>3</sub> , γ-CH, β-CH <sub>2</sub> , α-CH                                                                                                                                                                          |
| 4   | Valine                            | 0.99(d), 1.05(d), 2.26(m), 3.60(d)                            | γ-CH <sub>3</sub> , γ-CH <sub>3</sub> , β-CH, α-CH                                                                                                                                                                                              |
| 5   | Ethanol                           | 1.17 (t), 3.65 (q)                                            | β-CH <sub>3</sub> , CH <sub>2</sub>                                                                                                                                                                                                             |
| 6   | Alanine                           | 1.47(d), 3.78(q)                                              | β-CH <sub>3</sub> , α-CH                                                                                                                                                                                                                        |
| 7   | Putrescine                        | 1.76 (m), 3.04 (m)                                            | 2CH <sub>2</sub> , 2N-CH <sub>2</sub>                                                                                                                                                                                                           |
| 8   | Acetate                           | 1.91(s)                                                       | CH <sub>3</sub>                                                                                                                                                                                                                                 |
| 9   | Glutamate                         | 2.08(m), 2.12(m), 2.34(m), 2.37(m), 3.75(m)                   | half β-CH <sub>2</sub> , half β-CH <sub>2</sub> , half γ-CH <sub>2</sub> , half γ-CH <sub>2</sub> , α-CH                                                                                                                                        |
| 10  | Glutamine                         | 2.13(m), 2.42(m), 2.45(m), 3.77(t)                            | γ-CH <sub>2</sub> , β-CH <sub>2</sub> , α-CH                                                                                                                                                                                                    |
| 11  | Methylamine (MA)                  | 2.59 (s)                                                      | N-CH <sub>3</sub>                                                                                                                                                                                                                               |
| 12  | Methionine                        | 1.98 (m), 2.13 (s), 2.17 (m), 2.66 (dd), 3.78 (m)             | δ-CH <sub>3</sub> , γ-CH <sub>2</sub> , β-CH <sub>2</sub>                                                                                                                                                                                       |
| 13  | Dimethylamine (DMA)               | 2.72 (s)                                                      | CH <sub>3</sub>                                                                                                                                                                                                                                 |
| 14  | Sarcosine                         | 2.74 (s), 3.6 (s)                                             | N-CH <sub>3</sub> , α-CH <sub>2</sub>                                                                                                                                                                                                           |
| 15  | Trimethylamine (TMA)              | 2.88 (s)                                                      | CH <sub>3</sub>                                                                                                                                                                                                                                 |
| 16  | Glutathione                       | 2.15(m), 2.55(m), 2.96(m), 3.77(m), 4.56(m)                   | β-CH <sub>2</sub> , γ-CH <sub>2</sub> , CH <sub>2</sub> -SH, α-CH&CH <sub>2</sub> -NH, CH-NH                                                                                                                                                    |
| 17  | Lysine                            | 1.43(m), 1.50(m), 1.73(m), 1.89(m), 1.92(m), 3.02(t), 3.75(t) | γ-CH <sub>2</sub> , half γ-CH <sub>2</sub> , δ-CH <sub>2</sub> , β-CH <sub>2</sub> , ε-CH <sub>2</sub> , α-CH                                                                                                                                   |
| 18  | Phosphocreatine (PCr)             | 3.05(s), 4.05(s)                                              | N-CH <sub>3</sub> , CH <sub>2</sub>                                                                                                                                                                                                             |
| 19  | beta-Alanine                      | 2.54(t), 3.17(t)                                              | CH <sub>2</sub> , CH <sub>2</sub>                                                                                                                                                                                                               |
| 20  | Choline                           | 3.21(s), 3.50(dd), 4.03(t)                                    | N-(CH <sub>3</sub> ) <sub>3</sub> , N-CH <sub>2</sub> , CH <sub>2</sub> OH                                                                                                                                                                      |
| 21  | sn-Glycero-3-phosphocholine (GPC) | 3.23(s), 3.60(dd), 3.68(dd), 3.87(m), 3.94(m), 4.33(m)        | N-(CH <sub>3</sub> ) <sub>3</sub> , half <sup>1</sup> CH <sub>2</sub> , <sup>2</sup> CH <sub>2</sub> , half <sup>1</sup> CH <sub>2</sub> , half <sup>3</sup> CH <sub>2</sub> , half <sup>3</sup> CH <sub>2</sub> , <sup>1</sup> CH <sub>2</sub> |
| 22  | Trimethylamine N-oxide (TMAO)     | 3.26(s)                                                       | CH <sub>3</sub>                                                                                                                                                                                                                                 |
| 23  | Taurine                           | 3.24(t), 3.41(t)                                              | <sup>1</sup> CH <sub>2</sub> , <sup>2</sup> CH <sub>2</sub>                                                                                                                                                                                     |
| 24  | myo-Inositol                      | 3.28(t), 3.53(dd), 3.63(t), 4.07(t)                           | <sup>2</sup> CH, <sup>4,6</sup> CH, <sup>1,3</sup> CH, <sup>5</sup> CH                                                                                                                                                                          |
| 25  | Glycine                           | 3.57(s)                                                       | α-CH <sub>2</sub>                                                                                                                                                                                                                               |
| 26  | Threonine                         | 1.31(d), 3.59(d), 4.25(m)                                     | γ-CH <sub>2</sub> , β-CH                                                                                                                                                                                                                        |
| 27  | Creatine                          | 3.04(s), 3.93(s)                                              | N-CH <sub>3</sub> , α-CH <sub>2</sub>                                                                                                                                                                                                           |
| 28  | Lactate                           | 1.33(d), 4.11(q)                                              | β-CH <sub>3</sub> , α-CH                                                                                                                                                                                                                        |

|    |                                      |                                                                                |                                                                                                            |
|----|--------------------------------------|--------------------------------------------------------------------------------|------------------------------------------------------------------------------------------------------------|
| 29 | O-Phosphocholine (PC)                | 3.20(s), 3.59(t), 4.18(m)                                                      | N-(CH <sub>3</sub> ) <sub>3</sub> , N-CH <sub>2</sub> , CH <sub>2</sub> OH                                 |
| 30 | Glucose                              | β(3.24 (dd), 3.48 (t), 3.90 (dd)), α(3.54 (dd), 3.71 (t), 3.72 (dd), 3.83 (m)) | β(H <sub>2</sub> , H <sub>3</sub> , H <sub>5</sub> ), α(H <sub>2</sub> , H <sub>3</sub> , H <sub>6</sub> ) |
| 31 | UDP-Glucose (UDPG)                   | 5.62 (dd), 6.0 (m)                                                             | CH, 2CH                                                                                                    |
| 32 | UDP-N-Acetylglucosamine (UDP-GlcNAc) | 2.07 (s), 5.5 (q), 6.0 (dd), 7.94 (d), 8.3 (d)                                 | CH <sub>3</sub> , CH, 2CH, CH, NH                                                                          |
| 33 | NADH                                 | 4.37(m), 4.17(m), 4.69(t), 6.14(d), 8.45(s)                                    | CH, CH, CH, NH <sub>2</sub> , CH                                                                           |
| 34 | Carnosine                            | 2.68(m), 3.02(q), 7.06(s)                                                      | CH <sub>2</sub> , CH                                                                                       |
| 35 | Tyrosine                             | 3.05(dd), 3.19(dd), 6.92(d), 7.19(d)                                           | half β-CH <sub>2</sub> , half β-CH <sub>2</sub> , β-CH, α-CH                                               |
| 36 | Phenylalanine                        | 3.12(dd), 3.30(dd), 3.99(dd), 7.33(d), 7.37(t), 7.43(t)                        | α-CH, half β-CH <sub>2</sub> , half β-CH <sub>2</sub> , α-CH, β-CH, γ-CH                                   |
| 37 | Pyridoxine                           | 2.46(s), 4.81(s), 7.68(s)                                                      | CH <sub>3</sub> , CH <sub>2</sub> , CH                                                                     |
| 38 | Histidine                            | 7.06(s), 7.85(s)                                                               | <sup>5</sup> CH, <sup>2</sup> CH                                                                           |
| 39 | GTP                                  | 5.92 (d), 8.1 (s)                                                              | CH, CH                                                                                                     |
| 40 | AMP                                  | 6.14 (d), 8.27 (s), 8.58 (s)                                                   | NH <sub>2</sub> , δ-CH, <sup>2</sup> CH                                                                    |
| 41 | NAD <sup>+</sup>                     | 6.03(d), 6.08(s), 8.16(s), 8.20(m), 8.41(s), 8.82(d), 9.13(d), 9.32(s)         | NH <sub>2</sub> , NH <sub>2</sub> (CO), δ-CH, β-CH, <sup>2</sup> CH, γ-CH, α-CH                            |
| 42 | Formate                              | 8.46(s)                                                                        | CH                                                                                                         |
| 43 | NADPH                                | 4.20(m), 5.97(m), 8.23(s), 8.47(s)                                             | CH, CH, CH, CH                                                                                             |
| 44 | ADP                                  | 6.13 (d), 8.27 (s), 8.58 (s)                                                   | NH <sub>2</sub> , δ-CH, <sup>2</sup> CH                                                                    |
| 45 | IMP                                  | 4.37(m), 6.14(d), 8.22 (s), 8.58 (s)                                           | CH, NH <sub>2</sub> , CH, CH                                                                               |

Multiplicity: s, singlet; d, double; t, triplet; q, quartet; m, multiple; dd, double of double. Abbreviations: DMA, dimethylamine; TMA, trimethylamine; PCr, phosphocreatine; GPC, sn-Glycero-3-phosphocholine; TMAO, trimethylamine N-oxide; PC, O-phosphocholine; UDPG, UDP-glucose; UDP-GlcNAc, UDP-N-acetylglucosamine; GTP, guanosine triphosphate; AMP, adenosine monophosphate; NAD<sup>+</sup>, nicotinamide adenine dinucleotide; ADP, adenosine diphosphate; IMP, hypoxanthine nucleotide.
